# Supplementary material for: Unassisted establishment of biological soil crusts on dryland road slopes
Source: Copernicus journal article supplement (doi:10.5194/we-19-39-2019), 2019-06-06
Supplement: Supplementary file 1 [file we-19-39-2019-supplement.pdf]

Supplement of Web Ecol., 19, 39–51, 2019  
<https://doi.org/10.5194/we-19-39-2019-supplement>  
© Author(s) 2019. This work is distributed under  
the Creative Commons Attribution 4.0 License.

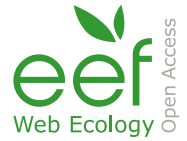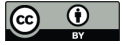

*Supplement of*

## **Unassisted establishment of biological soil crusts on dryland road slopes**

**Laura Concostrina-Zubiri et al.**

*Correspondence to:* Laura Concostrina-Zubiri ([laura.concostrina@urjc.es](mailto:laura.concostrina@urjc.es)) and Juan M. Arenas ([juanmariaae@gmail.com](mailto:juanmariaae@gmail.com))

The copyright of individual parts of the supplement might differ from the CC BY 4.0 License.

**Supplementary material** associated with the article: Concostrina-Zubiri et al. “UNASSISTED ESTABLISHMENT OF BIOLOGICAL SOIL CRUSTS ON ROADSLOPES: HINTS FOR ALTERNATIVE RESTORATION IN DRYLANDS”.

**The laboratory techniques used to determine each soil property:**

- 5  $\beta$ -glucosidase and acid phosphatase activities were estimated by determination of the amount of p-nitrophenol released from 0.5 g soil after incubation at 37 C for 1 h, with the substrate p-nitrophenyl phosphate in MUB buffer (pH 6.5) for phosphatase activity (Tabatabai & Bremner 1969), and with the substrate 4-nitrophenyl- $\beta$ -D- glucopyranoside in MUB buffer (pH 6.5) for glucosidase activity (Eivazi & Tabatabai 1988). Total organic carbon was determined by colorimetric techniques after oxidation
- 10 with a mixture of potassium dichromate and sulfuric acid (Yeomans & Bremner 1988), and total phosphorus and available total nitrogen on a 19 SKALAR SAN++ Analyzer (Skalar, Breda, The Netherlands) after digestion with sulfuric acid and Kjeldahl’s catalyst (Anderson & Ingram 1989). Potassium was measured with the same analyser after the soil samples had been shaken with distilled water (1:5 ratio) for 1 h. All of these analyses were performed in the NUTRILAB laboratory of Rey
- 15 Juan Carlos University (Madrid, Spain).
